# Supplementary material for: A fast-dissolving microneedle array loaded with chitosan nanoparticles to evoke systemic immune responses in mice
Source: Royal Society of Chemistry journal article supplement (doi:10.1039/c9tb02061f), 2019-11-16
Supplement: c9tb02061f1.pdf [file c9tb02061f1.pdf]

**Electronic supplementary information**

**A fast-dissolving microneedle array loaded with chitosan nanoparticles to  
evoke systemic immune responses in mice**

Zhilin Li, Yingju He, Li Deng \*, Zhi-Rong Zhang

Key Laboratory of Drug-Targeting and Drug Delivery System of the Education Ministry and

Sichuan Province, Sichuan Engineering Laboratory for Plant-Sourced Drug and Sichuan Research

Center for Drug Precision Industrial Technology, West China School of Pharmacy, Sichuan

University, Chengdu 610041, China

\*Corresponding author:

Email: denglisunny@163.com

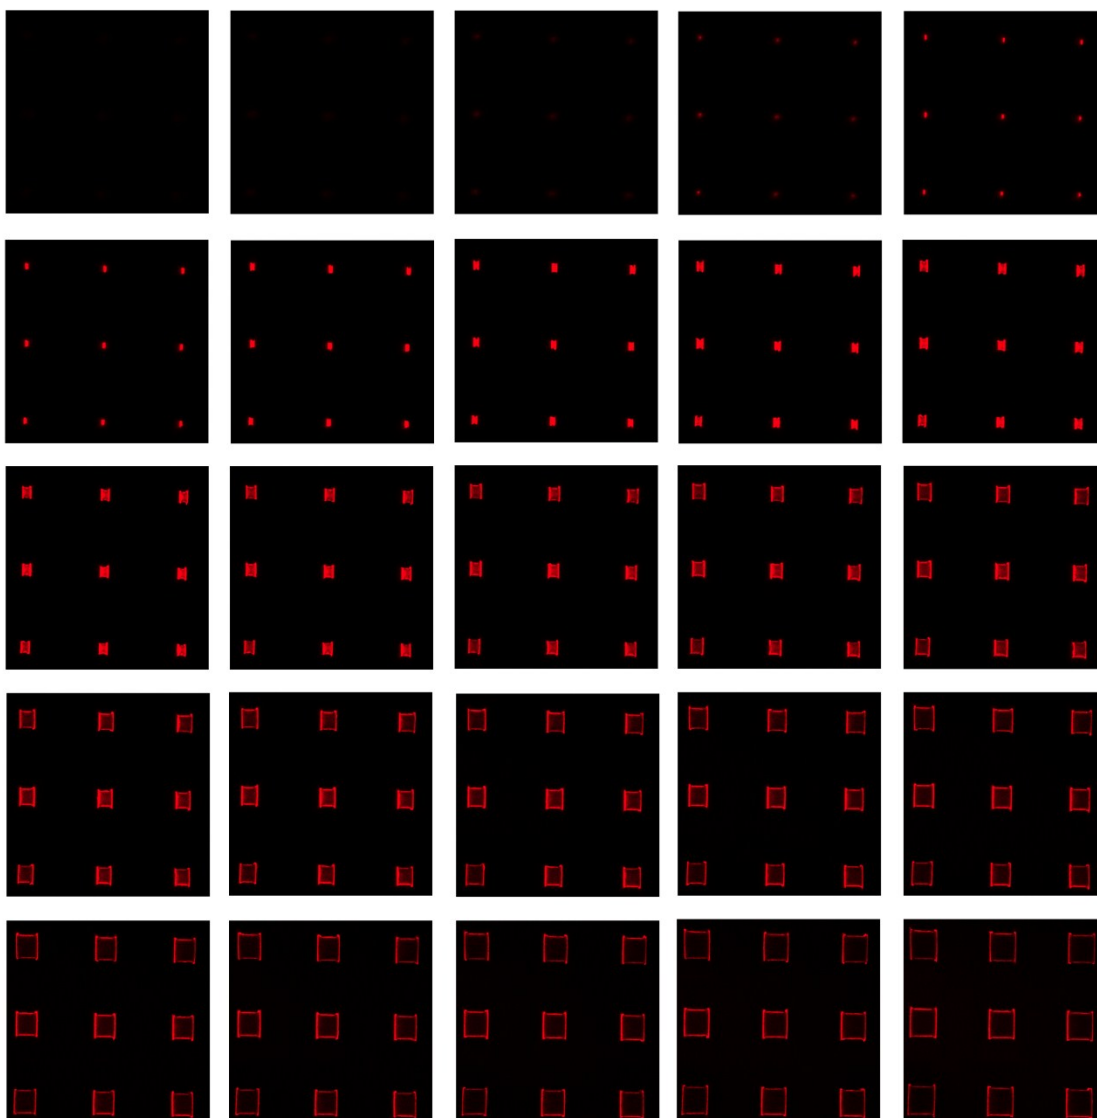

**Fig. S1** The Confocal scanning photos of the microneedle loading CS-OVA-CpG NPs in tips. The MN array was placed on a microscope slide and observed using confocal laser scanning microscope LSM800 (Carl Zeiss AG, Germany) at an excitation wavelength of 676 nm and emission wavelength of 696 nm. Images were obtained in the xy-plane (parallel to the base of the MN). The initially scanned the tips of MN ( $z = 0 \mu\text{m}$ ) was defined as the imaging plane of the first photo. Scanning was conducted once at the interval of  $22 \mu\text{m}$  from the tips through the z-

axis perpendicular to the xy-plane, and each needle was photographed via layer-by-layer scanning, and a total of 25 images were taken.

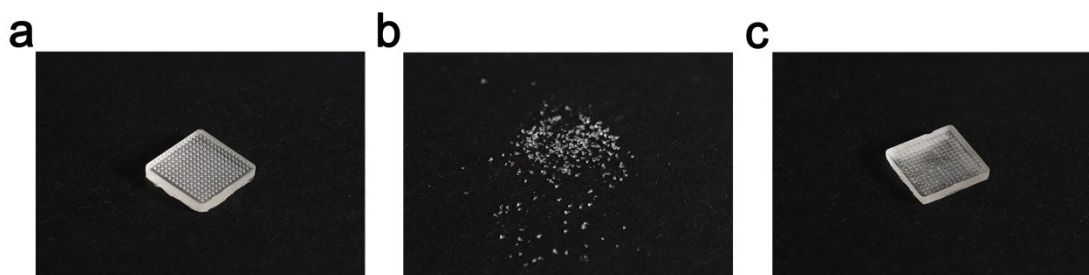

**Fig. S2** The images of intact MN (a), needles cut from MN (b) and the MN base without needles (c). Then these collected needles were dissolved in 350  $\mu\text{L}$  of ultrapure water to determine the amount of OVA and CpG.

**Table 1** The recovery of OVA and CpG in MN loading CS-OVA-CpG NPs and MN loading free OVA and CpG.

|                         | Recovery (%) |        |        | Average (%) | RSD (%) |
|-------------------------|--------------|--------|--------|-------------|---------|
| OVA in MN free OVA +CpG | 98.57        | 97.14  | 100.36 | 98.69       | 1.32    |
| CpG in MN free OVA+ CpG | 99.52        | 98.68  | 101.28 | 99.83       | 1.08    |
| OVA in MN NPs           | 99.82        | 102.16 | 100.14 | 100.71      | 1.04    |
| CpG in MN NPs           | 98.17        | 98.33  | 100.56 | 99.02       | 1.09    |

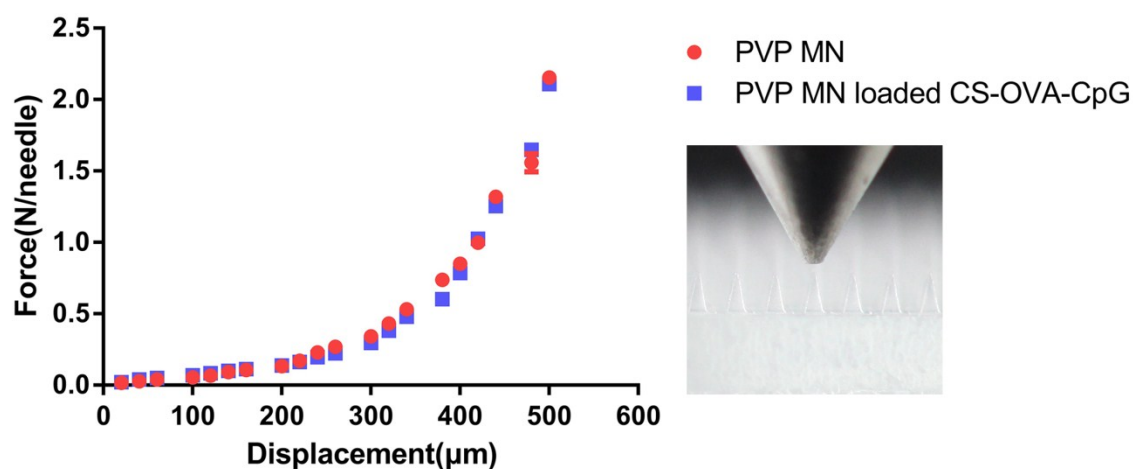

**Fig. S3** The mechanical property test results of PVP MN and PVP MN loaded CS-OVA-CpG NPs. Mechanical compression tests were performed using a universal testing machine (MARK-10, Copiague, USA). The MN array was fixed on the surface of flat stainless-steel plate, and then an axial force perpendicular to the axis of the MN array was applied by a moving sensor. The testing machine recorded the needle force when the moving sensor touched the uppermost point of the MN needle with required displacement move of the MN.

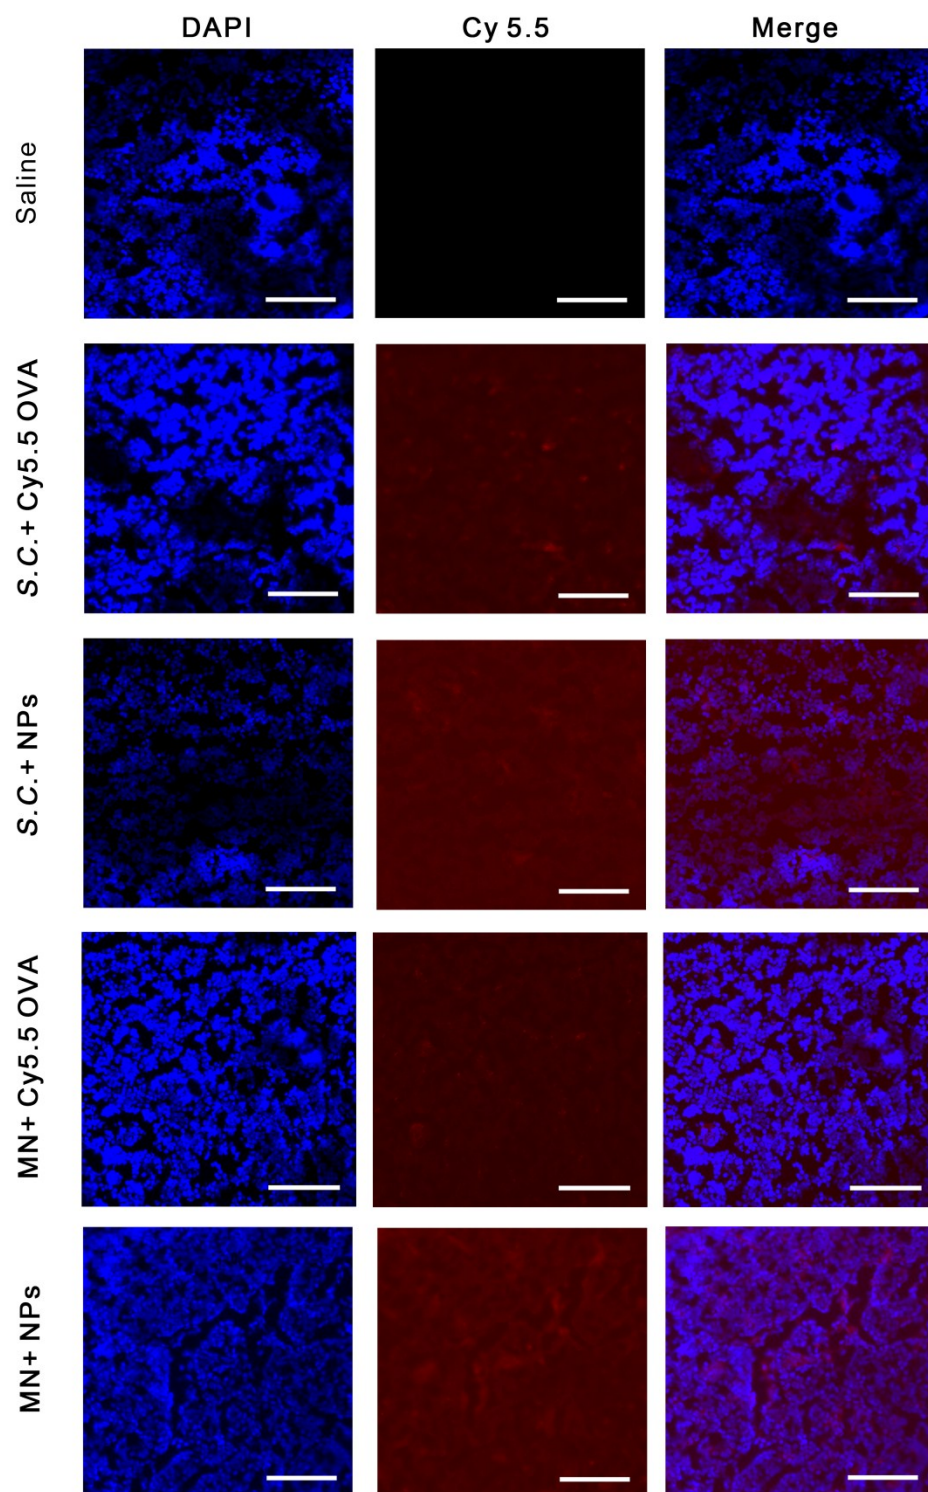

**Fig. S4** Frozen sections of LNs after subcutaneous injection or MN administration with saline, free OVA and CS-OVA-CpG NPs. Cell nuclei (DAPI, blue), Cy5.5-OVA (red) were observed by

inverted fluorescence scanning microscope (×200). Scale bars represent 50 μm.

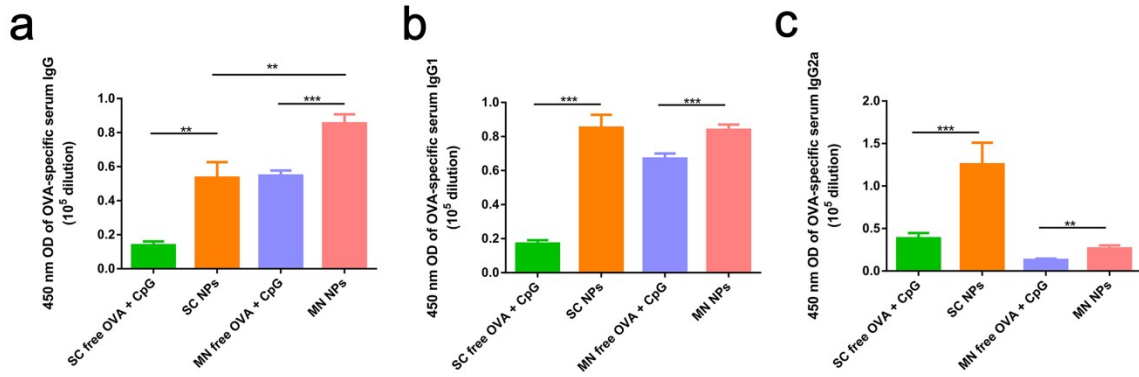

**Fig. S5** The influence of free OVA and CS-OVA-CpG NPs on OVA-specific antibody levels. OD<sub>450</sub> of OVA-specific IgG (a), IgG1 (b), and IgG2a (c) serum antibody levels three weeks post immunization (n = 5) were assayed using ELISA kits. Serum samples were diluted at 1:100000 for IgG and IgG1, and 1:10000 for IgG2a. Data represent mean ± SD. \**p* < 0.05, \*\**p* < 0.01, \*\*\**p* < 0.001

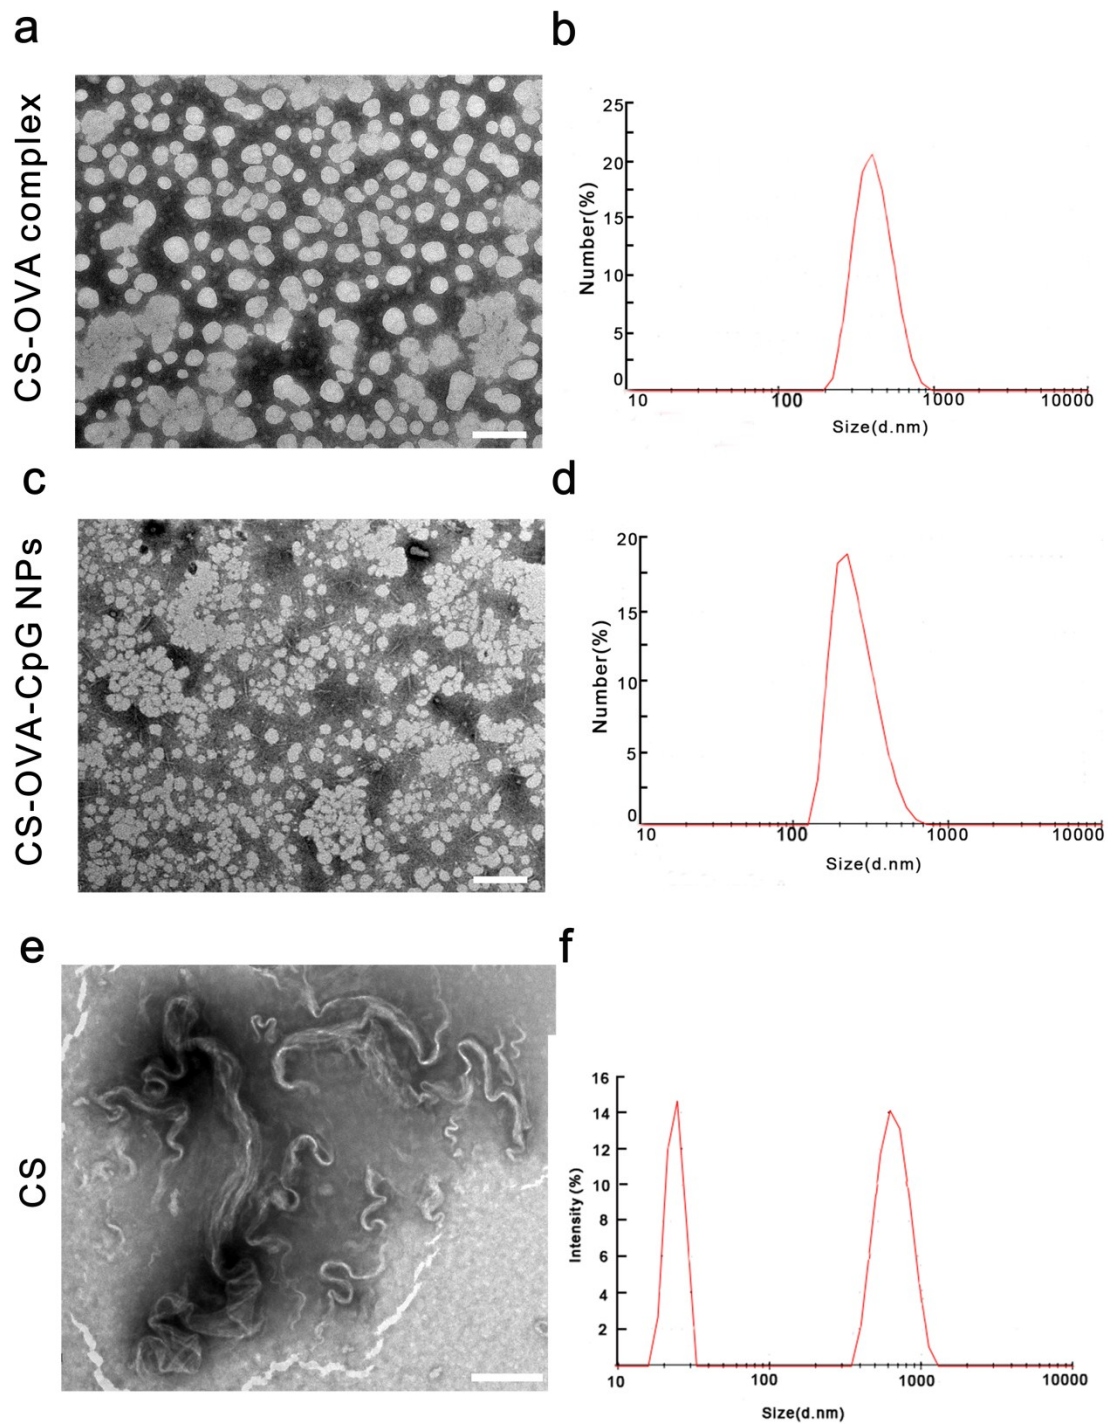

**Fig. S6** The aggregation morphology of CS-OVA complex (a) and CS-OVA-CpG NPs (c), Scale bars represent 200 nm. The dynamic light scattering (DLS) diameters of CS-OVA complex (b) and CS-

OVA-CpG NPs (d). (e) Chitoan is a linear glycopolymer forming entanglements under TEM. Scale bar represents 500 nm. (f) Size distribution profiles of CS solution by DLS measurement.
